# Supplementary material for: Directed evolution of an alcohol dehydrogenase for the desymmetric reduction of 2,2-disubstituted cyclopenta-1,3-diones by enzymatic hydrogen transfer
Source: Royal Society of Chemistry journal article supplement (doi:10.1039/d2cy00559j), 2022-01-01
Supplement: d2cy00559j1.pdf [file d2cy00559j1.pdf]

## Supporting Information

### **Directed evolution of an alcohol dehydrogenase for the desymmetric reduction of 2,2-disubstituted cyclopenta-1,3- diones by enzymatic hydrogen transfer**

Hongliu Zhang,<sup>a</sup> Liangyan Zhu,<sup>a,b</sup> Jinhui Feng,<sup>a</sup> Xiangtao Liu,<sup>a</sup> Xi Chen,<sup>\*a</sup> Qiaqing  
Wu,<sup>\*a</sup> and Dunming Zhu<sup>\*a</sup>

<sup>a</sup> Tianjin Engineering Research Center of Biocatalytic Technology, National  
Engineering Research Center of Industrial Enzymes and National Technology  
Innovation Center of Synthetic Biology, Tianjin Institute of Industrial Biotechnology,  
Chinese Academy of Sciences, Tianjin Airport Economic Area, 32 Xi Qi Dao, Tianjin  
300308 (P.R.China)

<sup>b</sup> University of Chinese Academy of Sciences  
No.19(A) Yuquan Road, Shijingshan District, Beijing, 100049 (P.R.China)

**Table S1** List of Primers

| Protein       | Primers(5'-3')                                                                                                  |
|---------------|-----------------------------------------------------------------------------------------------------------------|
| I49-Forward   | GTTTTTGAAGGCGCC <b>N</b> KGCGAAAGACATAACATGATACTCGG                                                             |
| I49-Reverse   | GTATCATGTTATGTCTTTCGCC <b>M</b> NGGCGCCTTCAAAAACGGTAT<br>G                                                      |
| L107-Forward  | CTCCGGTGAATG <b>N</b> KGAGGCTGGAAATTTTCGAATGTAAAAG                                                              |
| L107-Reverse  | CGAAAATTTCCAGCCTG <b>M</b> NNCATTCCACCGGAGTGCTGGTG<br>GTGGAATGCTGGCAGGC <b>N</b> KAAATTTTCGAATGTAAAAGATGGT<br>G |
| W110-Forward  | CTTTTACATTCGAAAATTT <b>M</b> NGCCTGCCAGCATTCCACCGGAGT<br>G                                                      |
| W110-Reverse  | CTTTTACATTCGAAAATTT <b>M</b> NGCCTGCCAGCATTCCACCGGAGT<br>G                                                      |
| N114-Forward  | GGAAATTTTCG <b>N</b> KGTAAGATGGTGTTTTTGGTGAATTTTTTC                                                             |
| N114-Reverse  | CAAAAACACCATCTTTTAC <b>M</b> NNCGAAAATTTCCAGCCTGCCAGC                                                           |
| Y267-Forward  | CACCATCGCTAATGTAAAT <b>N</b> KTTTGCGAAGGAGAGGTTTTGCC                                                            |
| Y267- Reverse | CCTCTCCTTCGCCAA <b>M</b> NNATTTACATTAGCGATGGTGCCACCAG<br>G                                                      |
| M285-Forward  | CTTGAATGGGGTTGCGGC <b>N</b> KGCTCATAAACTATAAAAGGCGG<br>G                                                        |
| M285-Reverse  | CTTTTATAGTTTTATGAG <b>M</b> NGCCGCAACCCATTCAAGACGAG                                                             |
| L294-Forward  | CTATAAAAGGCGGG <b>N</b> KTGCCCCGGTGGACGTCTAAGAATGG                                                              |
| L294-Reverse  | CTTAGACGTCCACCGGGC <b>M</b> NNCCCGCCTTTTATAGTTTTATG                                                             |

**Table S2.** Chiral HPLC and GC methods of racemates

| Racemate                                                                            | Method                                                                 |
|-------------------------------------------------------------------------------------|------------------------------------------------------------------------|
| 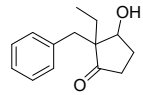   | Chiralcel OD-H, <i>n</i> -Hex/ <i>i</i> -PrOH 97/3, 0.8 mL/min, 210 nm |
|    | Chiralcel OD-H, <i>n</i> -Hex/ <i>i</i> -PrOH 97/3, 0.8 mL/min, 210 nm |
|    | Chiralcel OD-H, <i>n</i> -Hex/ <i>i</i> -PrOH 97/3, 0.8 mL/min, 210 nm |
|    | Chiralcel OD-H, <i>n</i> -Hex/ <i>i</i> -PrOH 98/2, 0.8 mL/min, 210 nm |
|   | Chiralcel OD-H, <i>n</i> -Hex/ <i>i</i> -PrOH 98/2, 0.8 mL/min, 210 nm |
|  | Chiralcel OD-H, <i>n</i> -Hex/ <i>i</i> -PrOH 99/1, 1 mL/min, 210 nm   |
|  | Chiralcel OD-H, <i>n</i> -Hex/ <i>i</i> -PrOH 97/3, 0.8 mL/min, 210 nm |
|  | Chiralcel OD-H, <i>n</i> -Hex/ <i>i</i> -PrOH 98/2, 0.8 mL/min, 210 nm |
|  | Chiralcel OD-H, <i>n</i> -Hex/ <i>i</i> -PrOH 99/1, 1 mL/min, 210 nm   |
|  | Chiralcel OD-H, <i>n</i> -Hex/ <i>i</i> -PrOH 99/1, 1 mL/min, 210 nm   |

|                                                                                   |                                                                                                                          |
|-----------------------------------------------------------------------------------|--------------------------------------------------------------------------------------------------------------------------|
| 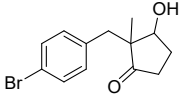 | <p>Chiralcel OD-H, <i>n</i>-Hex/<i>i</i>-PrOH 99/1, 1 mL/min, 210 nm</p>                                                 |
|  | <p>CP-Chirasil DEX CB 25×0.25, 60°C, maintain 1 min,<br/>3°C/min to 120 °C, then 40 °C/min to 180 °C, maintain 2 min</p> |
|  | <p>CP-Chirasil DEX CB 25×0.25, 60°C, maintain 1 min, 3<br/>°C/min to 120 °C, then 40 °C/min to 180°C, maintain 2 min</p> |

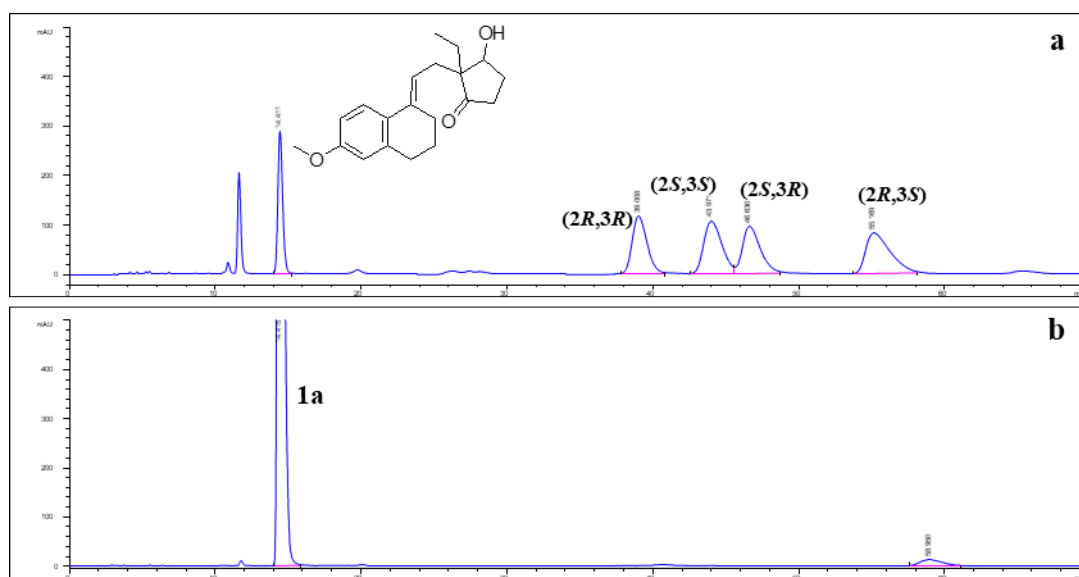

**Figure S1** HPLC traces for **a**) the NaBH<sub>4</sub>-reduction products of **1a** (racemic diastereomers); **b**) the WT enzyme reduction.

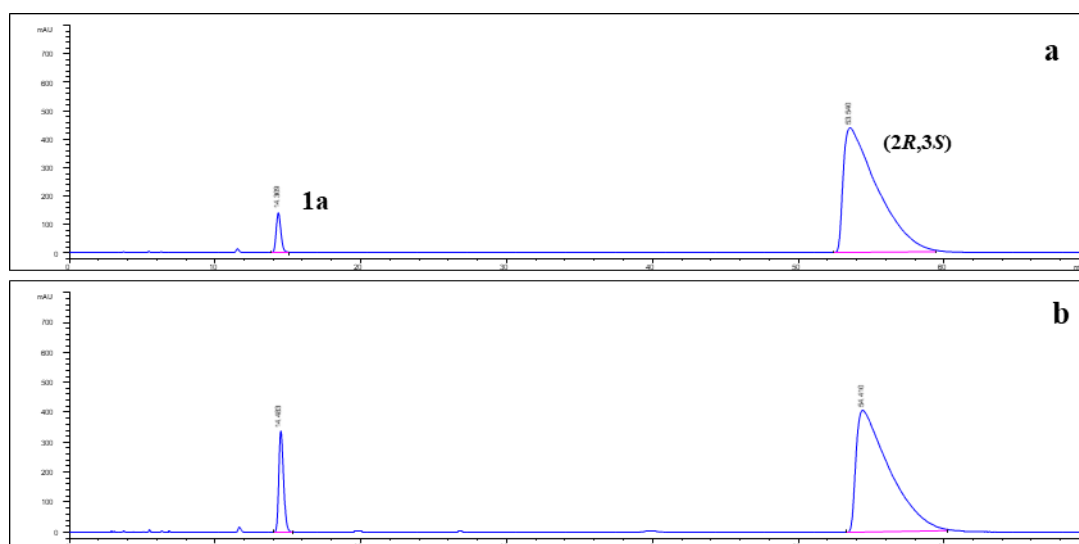

**Figure S2** HPLC traces for **a**) the L294A enzyme reduction; **b**) the L294N enzyme reduction.

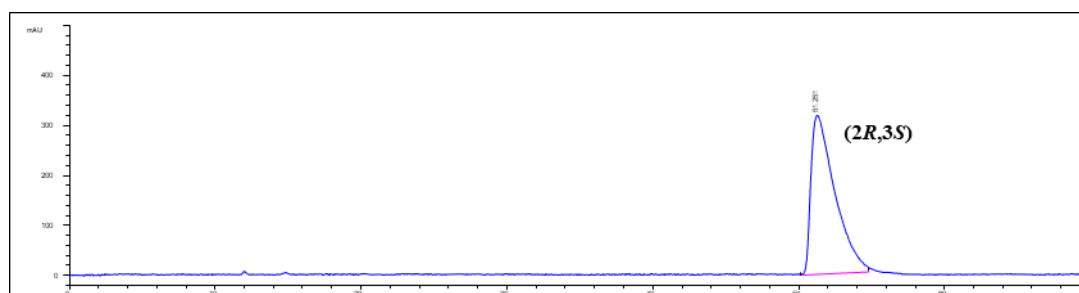

**Figure S3** HPLC traces for the Tb1 (L294P) enzyme reduction.

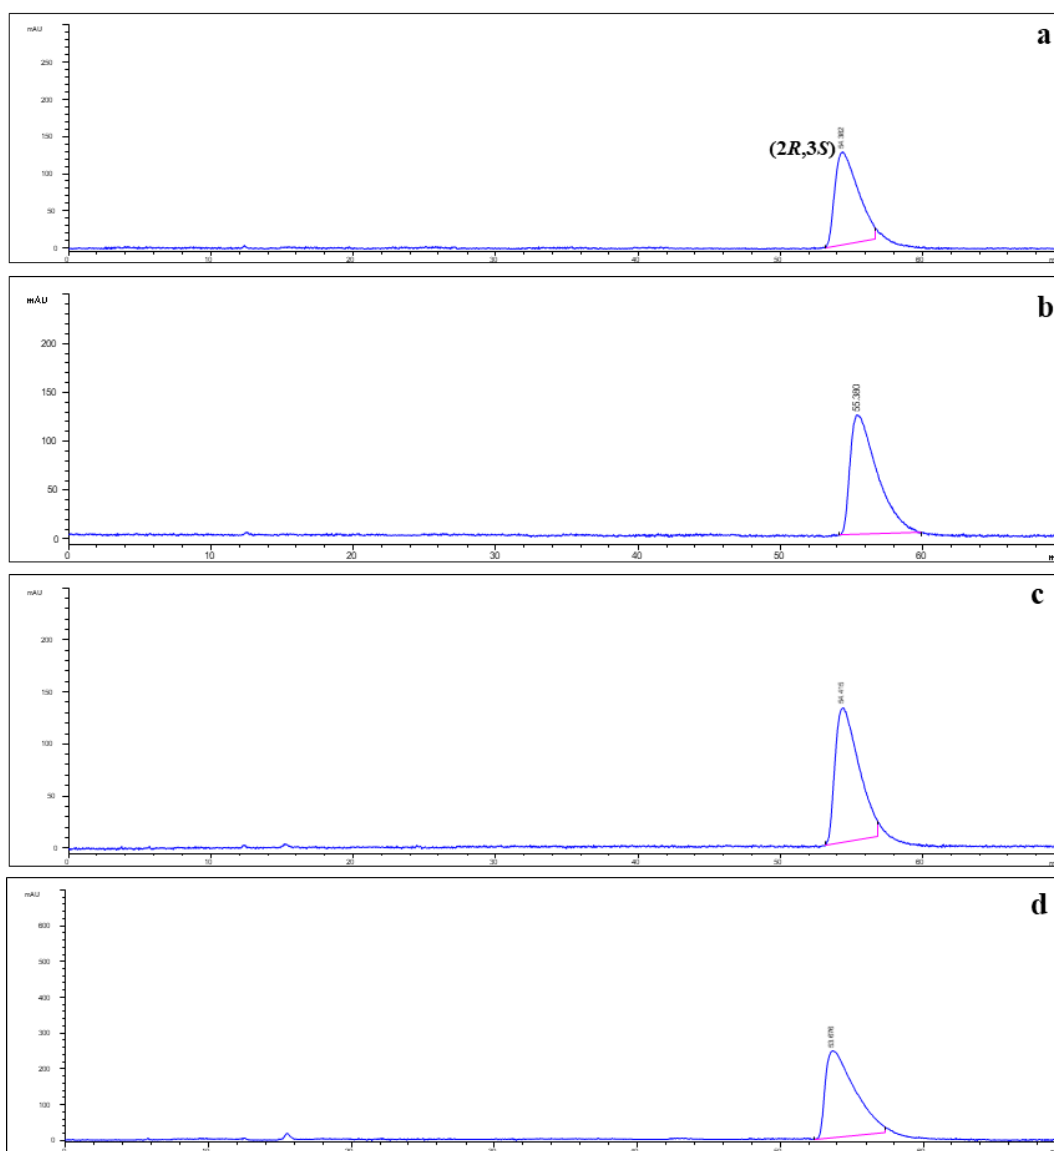

**Figure S4** HPLC traces for **a)** the Tb2 (L294P/N114G) enzyme reduction; **b)** the L194P/W110V enzyme reduction; **c)** the L294P/M285L enzyme reduction; **c)** the Tb3(L294P/N114G/M285L) enzyme reduction.

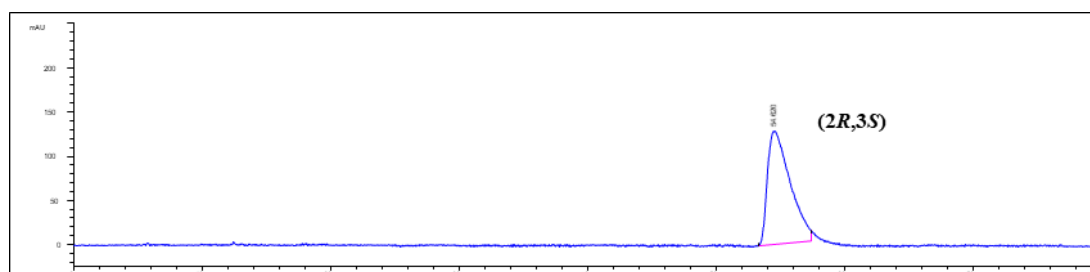

**Figure S5** HPLC traces for **a)** the Tb4 (L294P/N114G/M285L/W110V) enzyme reduction.

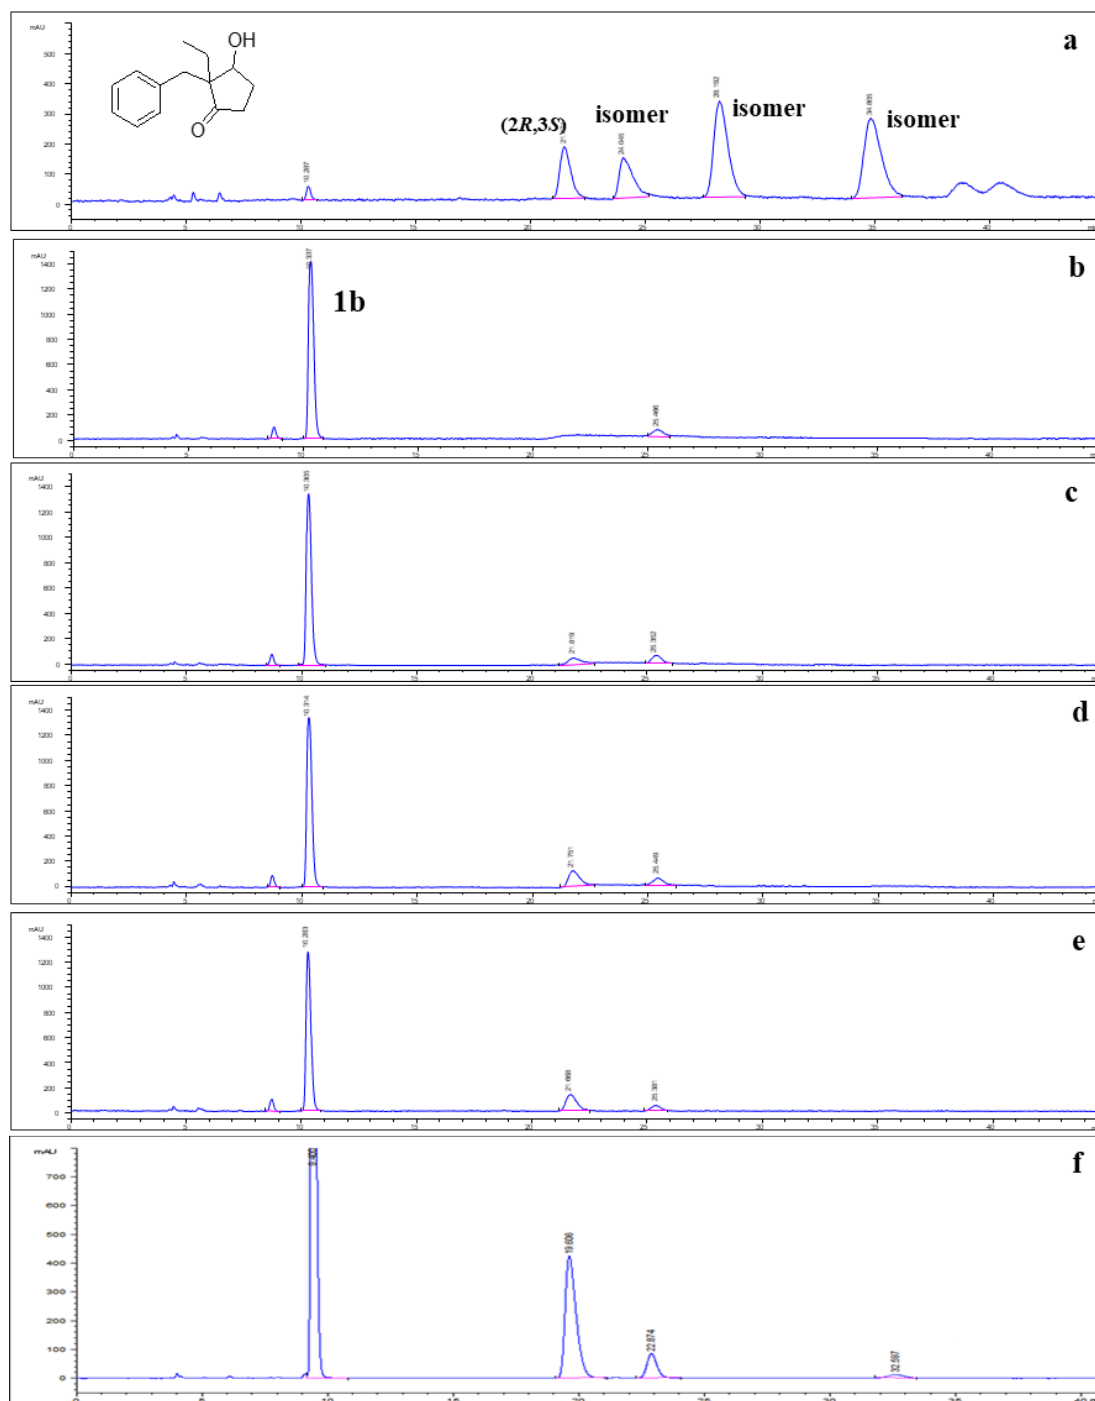

**Figure S6** HPLC traces for **a)** the NaBH<sub>4</sub>-reduction products of **1b** (racemic diastereomers) **b)** the WT enzyme reduction; **c)** the Tb1 enzyme reduction; **d)** the Tb2 enzyme reduction; **e)** the Tb3 enzyme reduction; **f)** the Tb4 enzyme reduction.

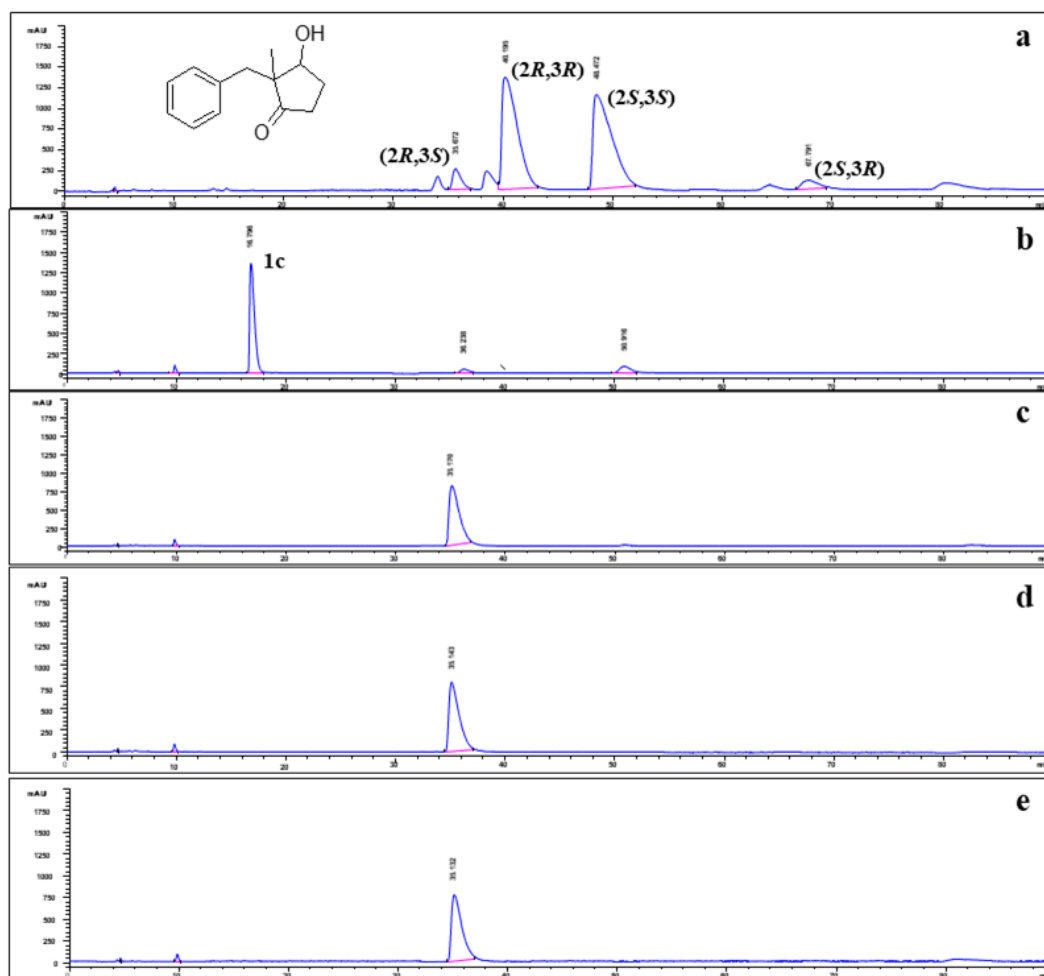

**Figure S7** HPLC traces for **a**) the NaBH<sub>4</sub>-reduction products of **1c** (racemic diastereomers); **b**) the WT enzyme reduction; **c**) the Tb1 enzyme reduction; **d**) the Tb2 enzyme reduction; **e**) the Tb3 enzyme reduction.

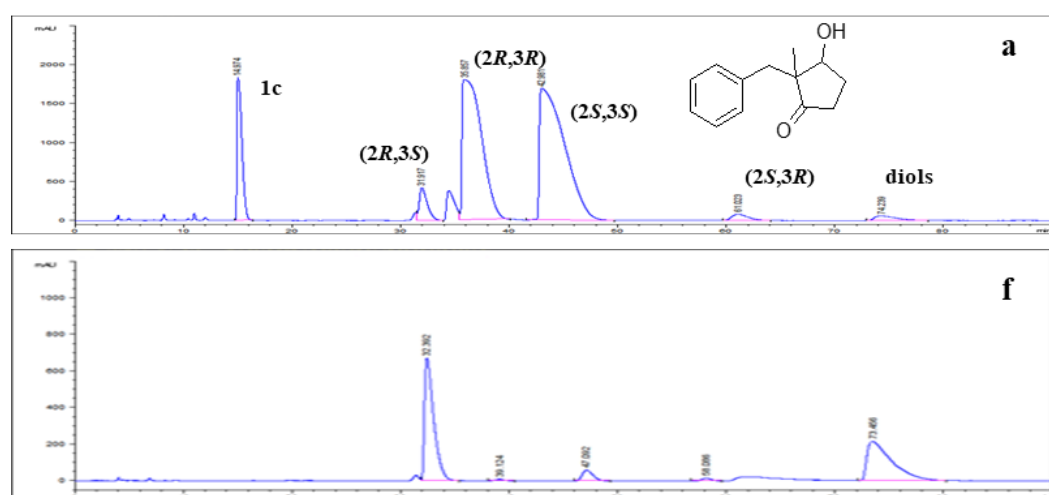

**Figure S8** HPLC traces for **a**) the NaBH<sub>4</sub>-reduction products of **1c** (racemic diastereomers); **f**) the Tb4 enzyme reduction.



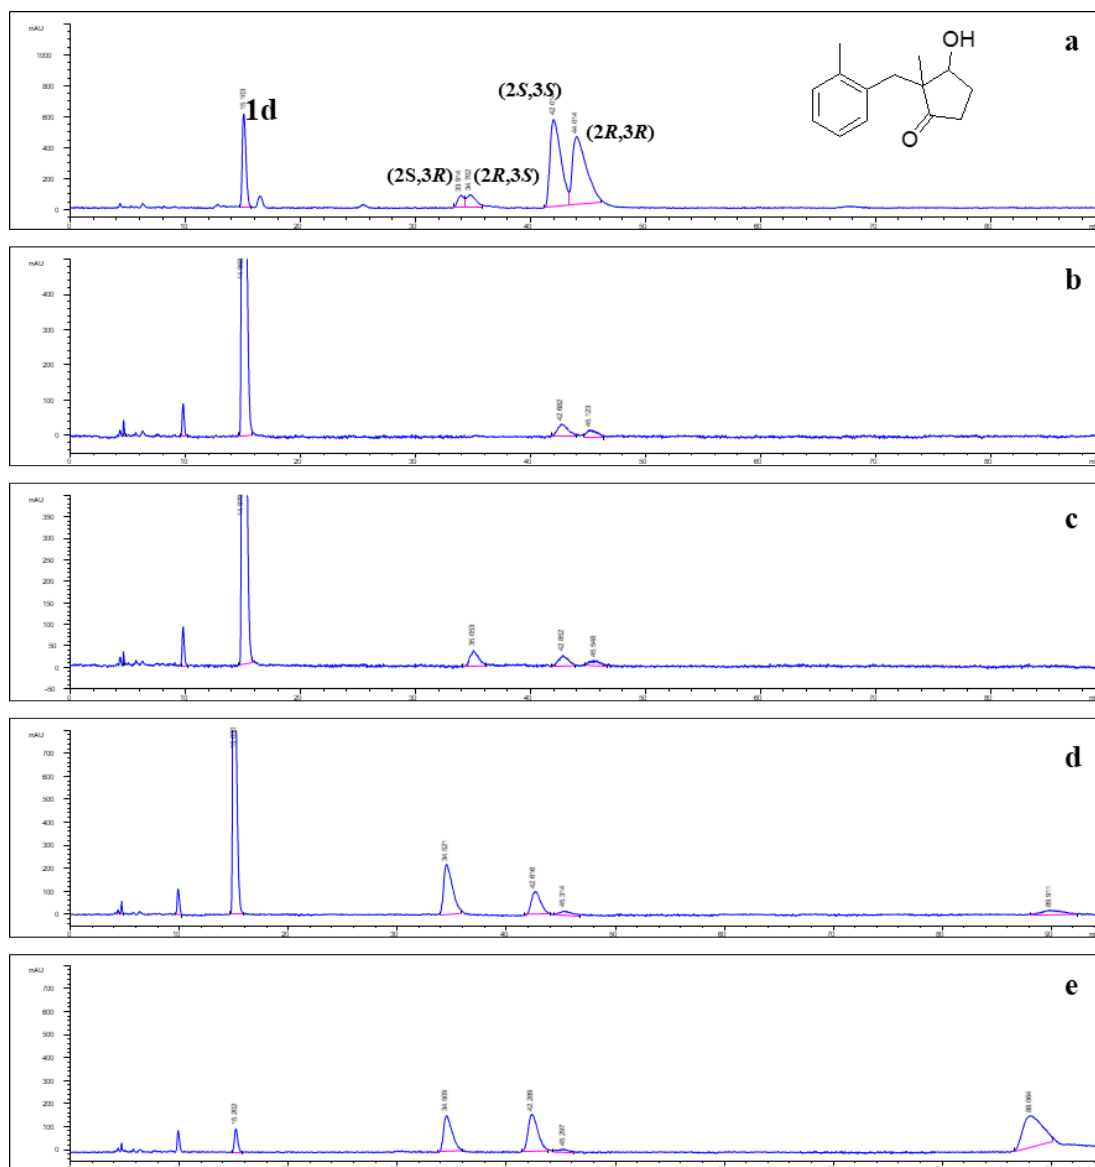

**Figure S9** HPLC traces for a) the NaBH<sub>4</sub>-reduction products of **1d** (racemic diastereomers); b) the WT enzyme reduction; c) the Tb1 enzyme reduction; d) the Tb2 enzyme reduction; e) the Tb3 enzyme reduction.

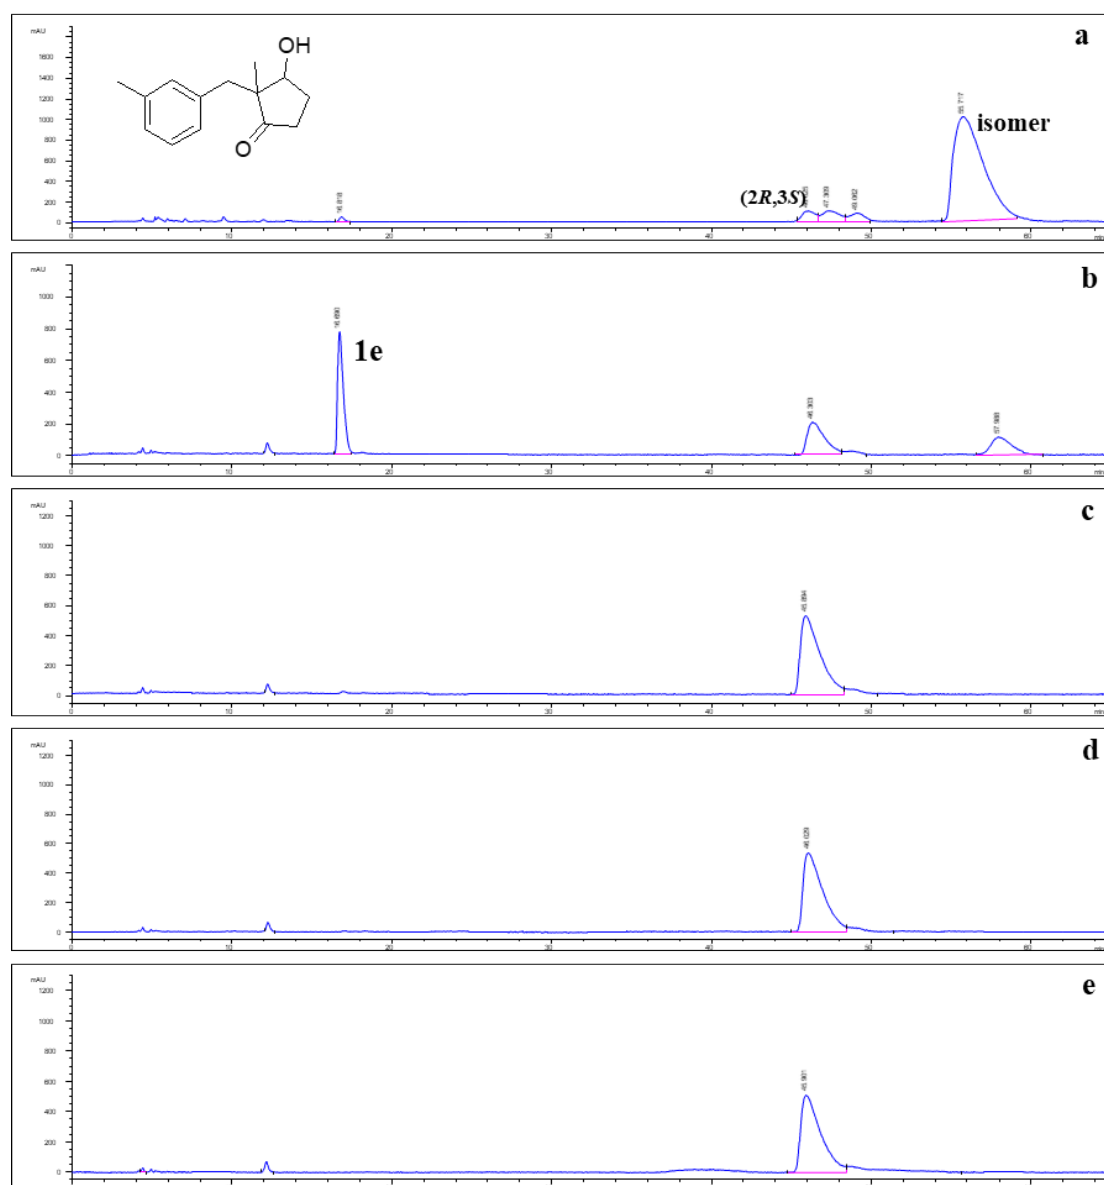

**Figure S10** HPLC traces for a) the NaBH<sub>4</sub>-reduction products of **1e** (racemic diastereomers); b) the WT enzyme reduction; c) the Tb1 enzyme reduction; d) the Tb2 enzyme reduction; e) the Tb3 enzyme reduction.

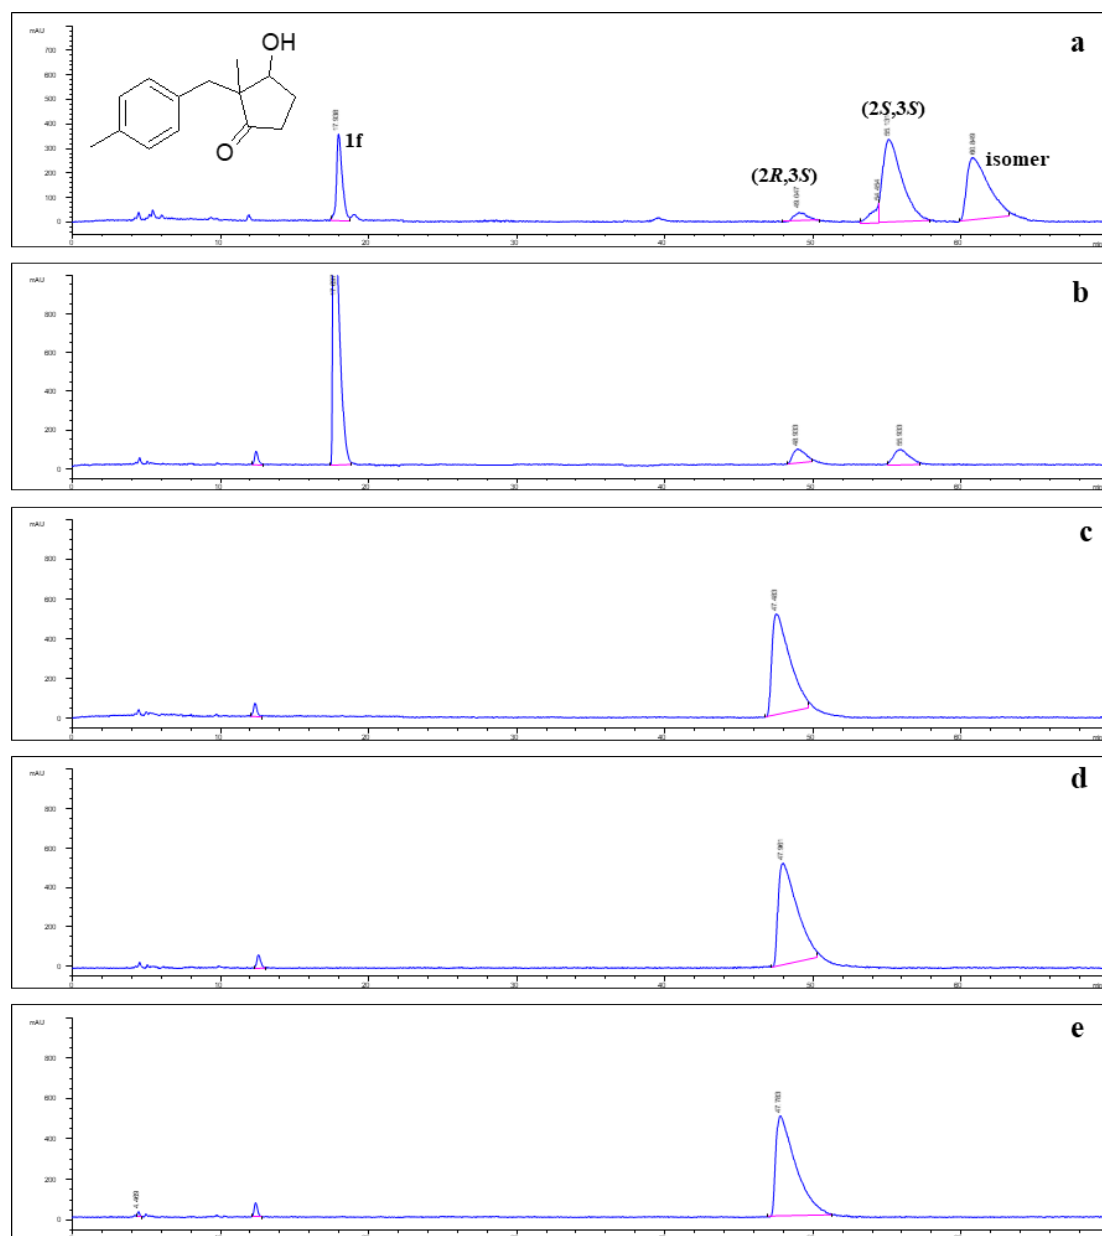

**Figure S11** HPLC traces for a) the NaBH<sub>4</sub>-reduction products of **1f** (racemic diastereomers); b) the WT enzyme reduction; c) the Tb1 enzyme reduction; d) the Tb2 enzyme reduction e) the Tb3 enzyme reduction.

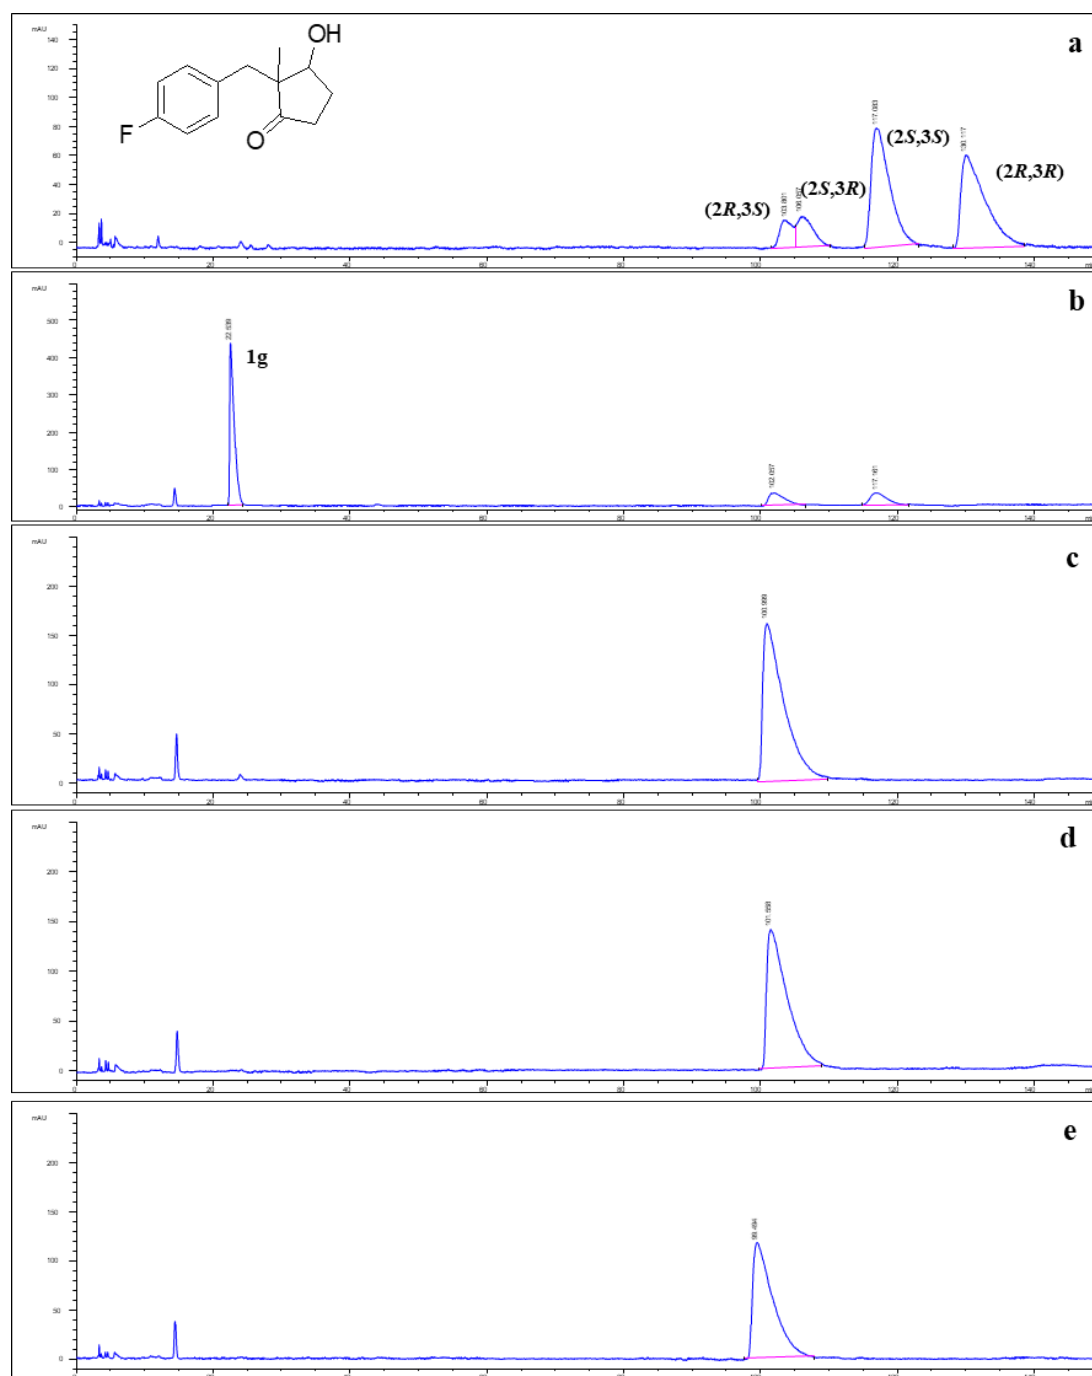

**Figure S12** HPLC traces for a) the NaBH<sub>4</sub>-reduction products of **1g** (racemic diastereomers) b) the WT enzyme reduction; c) the Tb1 enzyme reduction; d) the Tb2 enzyme reduction; e) the Tb3 enzyme reduction.

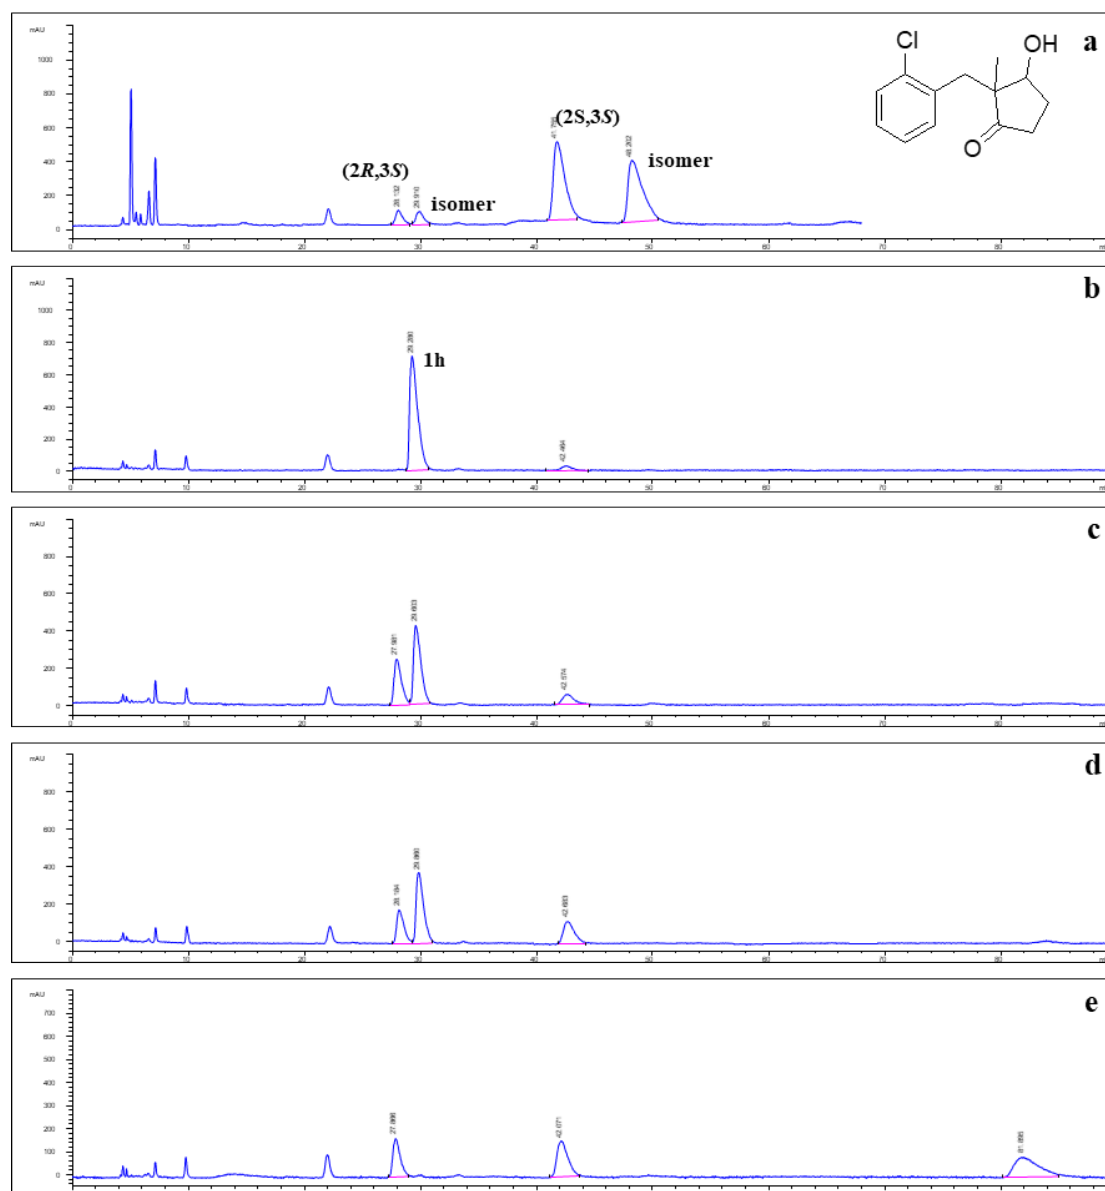

**Figure S13** HPLC traces for a) the NaBH<sub>4</sub>-reduction products of **1h** (racemic diastereomers) b) the WT enzyme reduction; c) the Tb1 enzyme reduction; d) the Tb2 enzyme reduction; e) the Tb3 enzyme reduction.

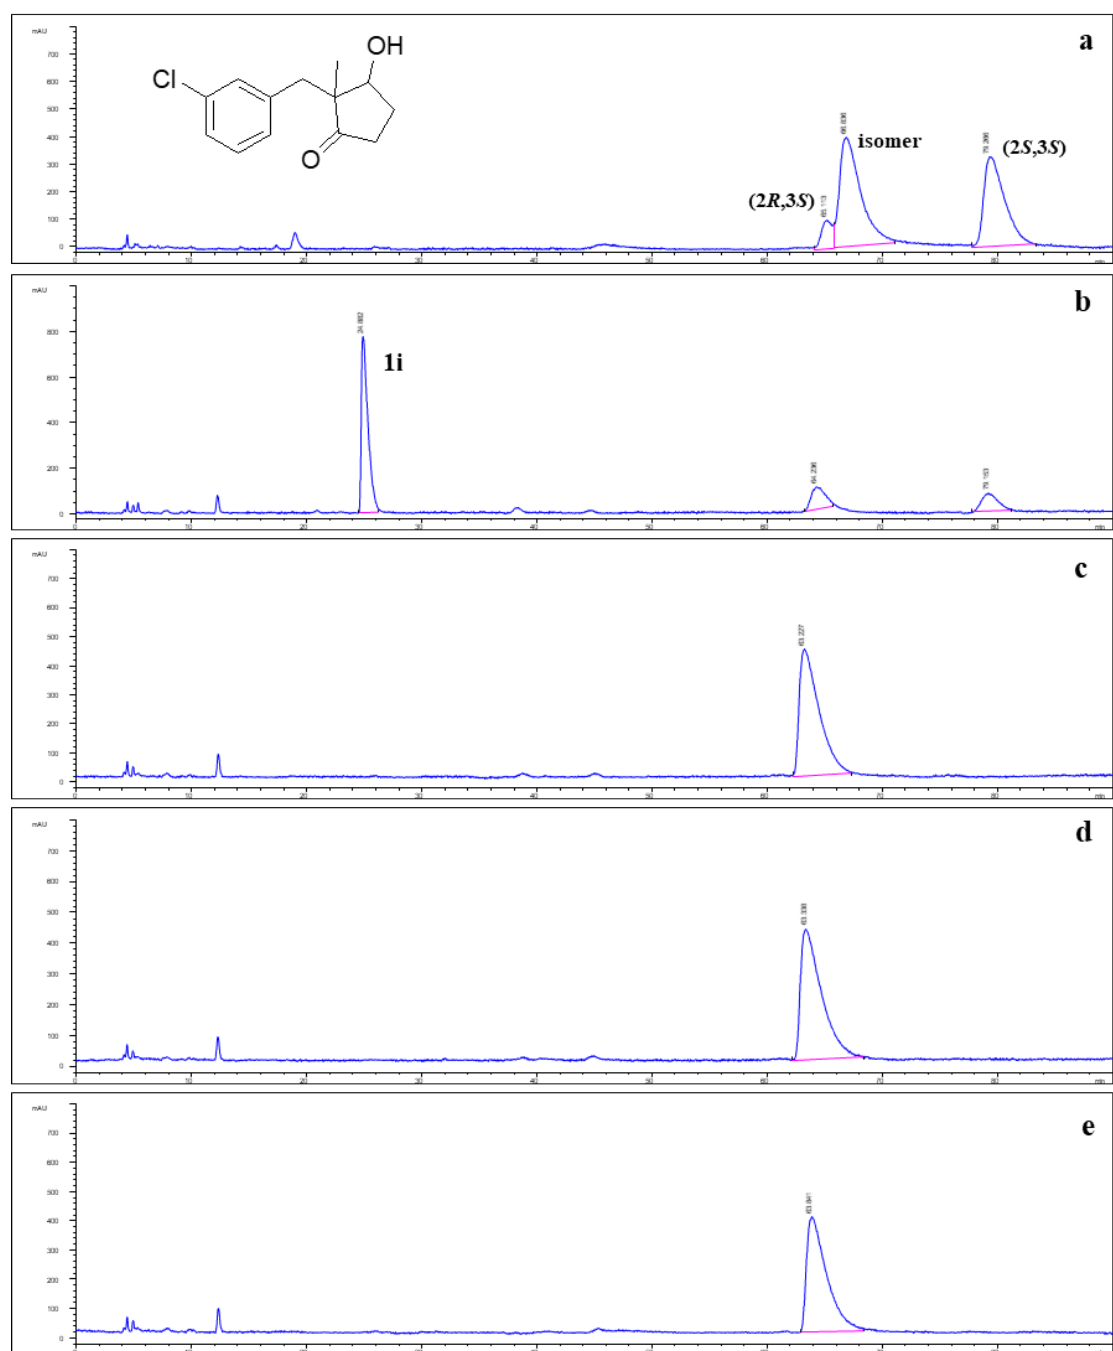

**Figure S14** HPLC traces for a) the NaBH<sub>4</sub>-reduction products of **1i** (racemic diastereomers) b) the WT enzyme reduction; c) the Tb1 enzyme reduction; d) the Tb2 enzyme reduction; e) the Tb3 enzyme reduction.

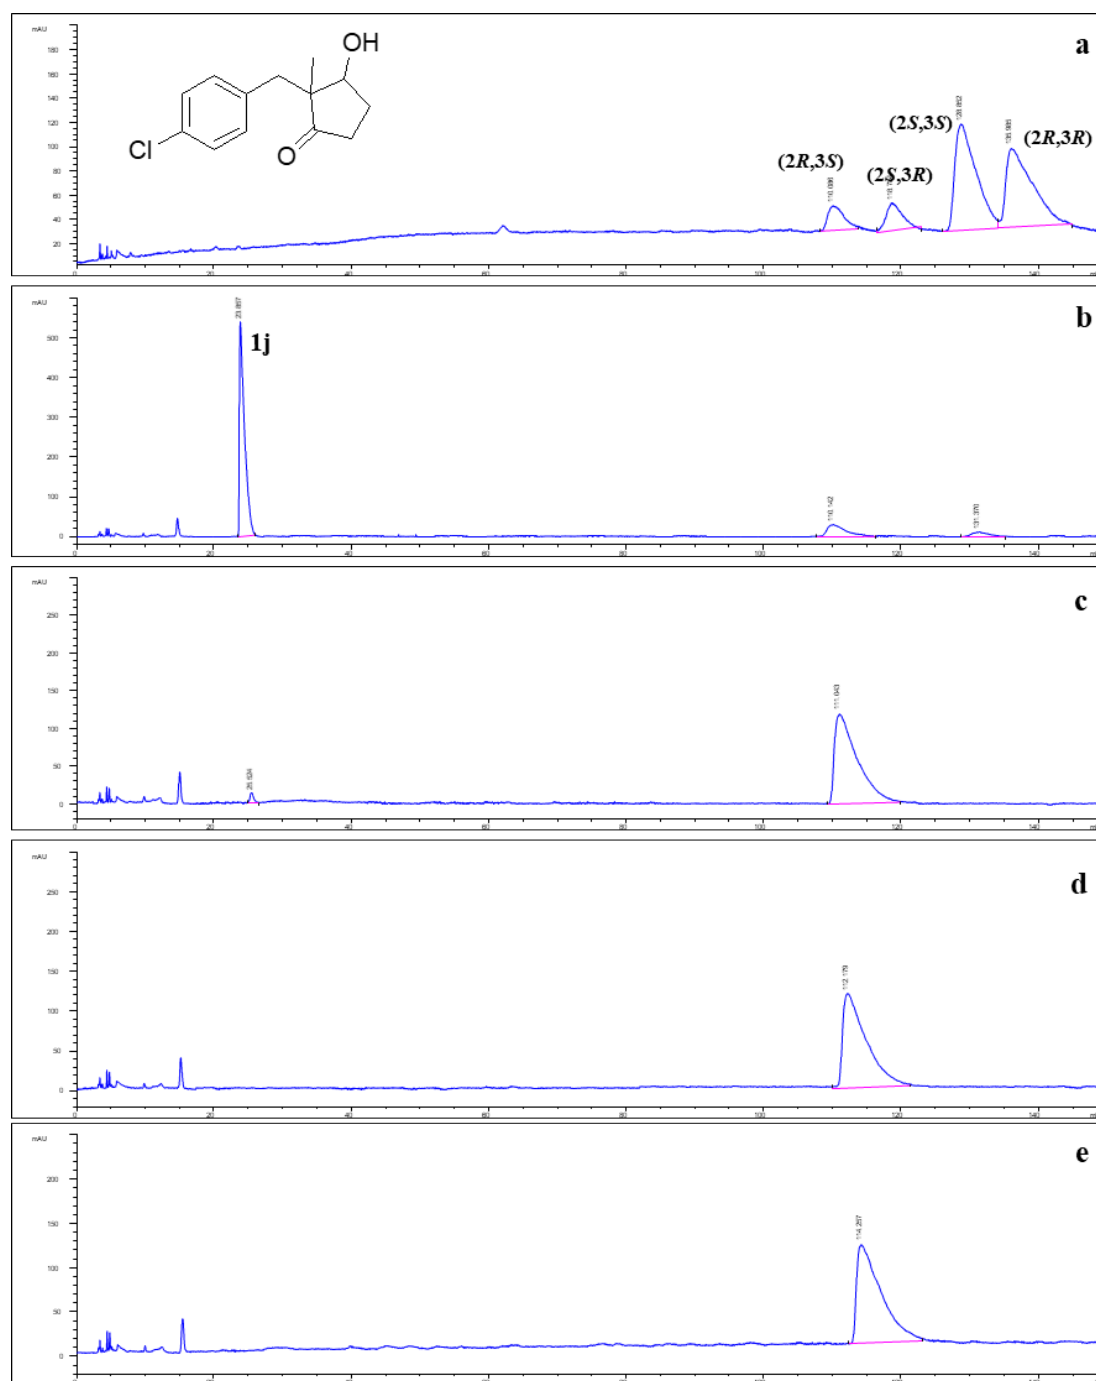

**Figure S15** HPLC traces for a) the NaBH<sub>4</sub>-reduction products of **1j** (racemic diastereomers) b) the WT enzyme reduction; c) the Tb1 enzyme reduction; d) the Tb2 enzyme reduction; e) the Tb3 enzyme reduction.

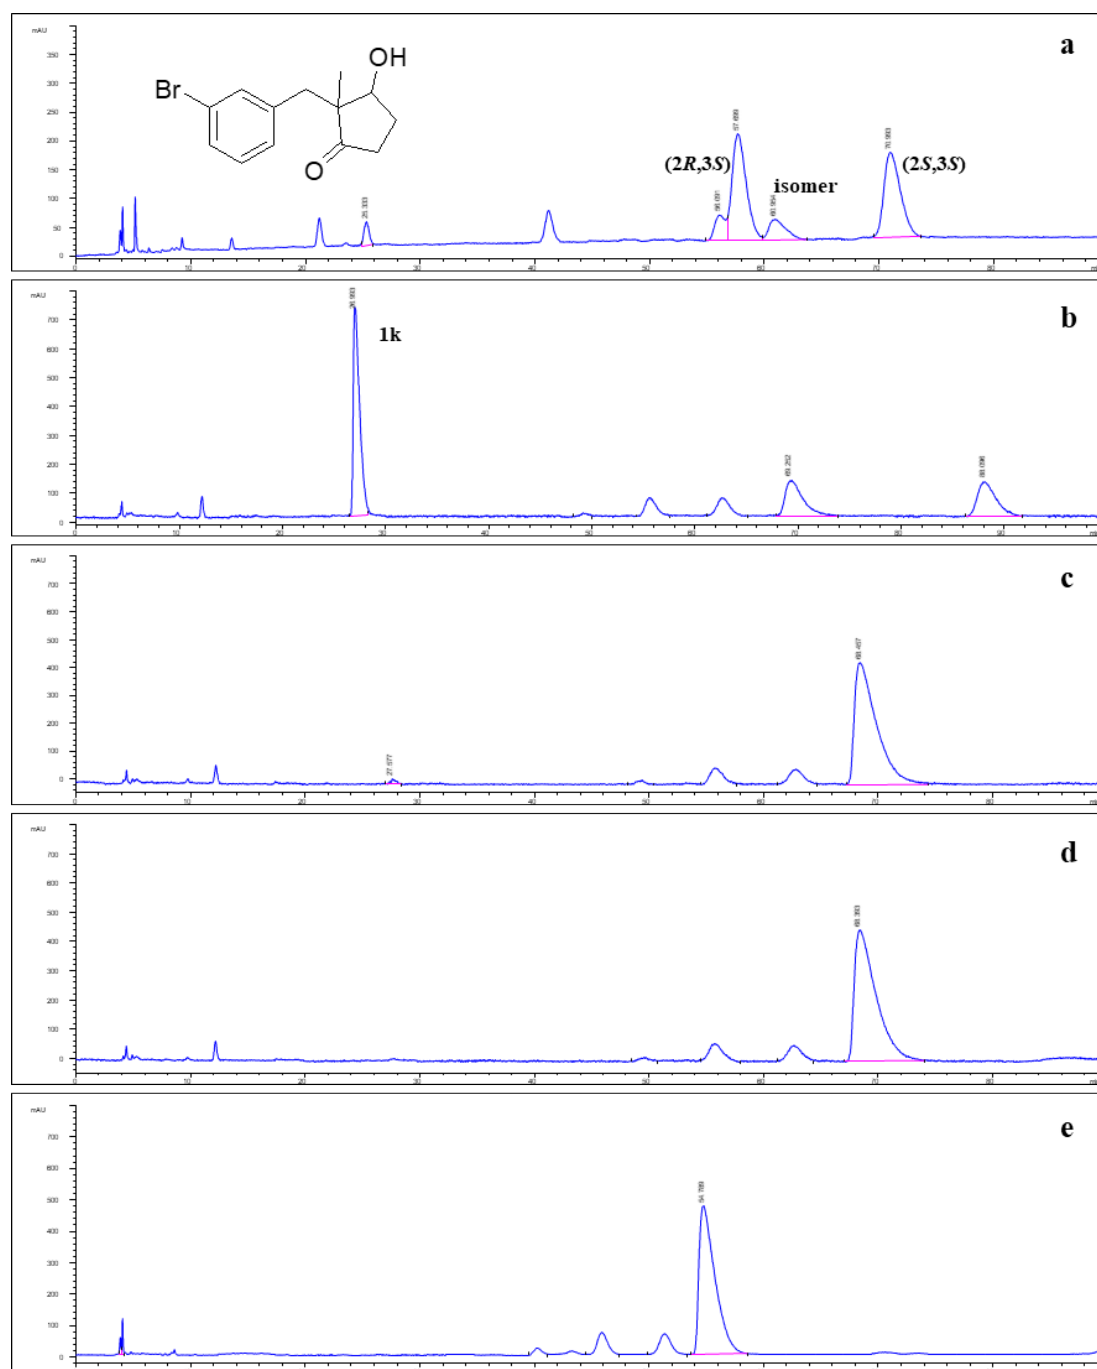

**Figure S16** HPLC traces for a) the NaBH<sub>4</sub>-reduction products of **1k** (racemic diastereomers) b) the WT enzyme c) the Tb1 enzyme reduction; d) the Tb2 enzyme reduction; e) the Tb3 enzyme reduction.



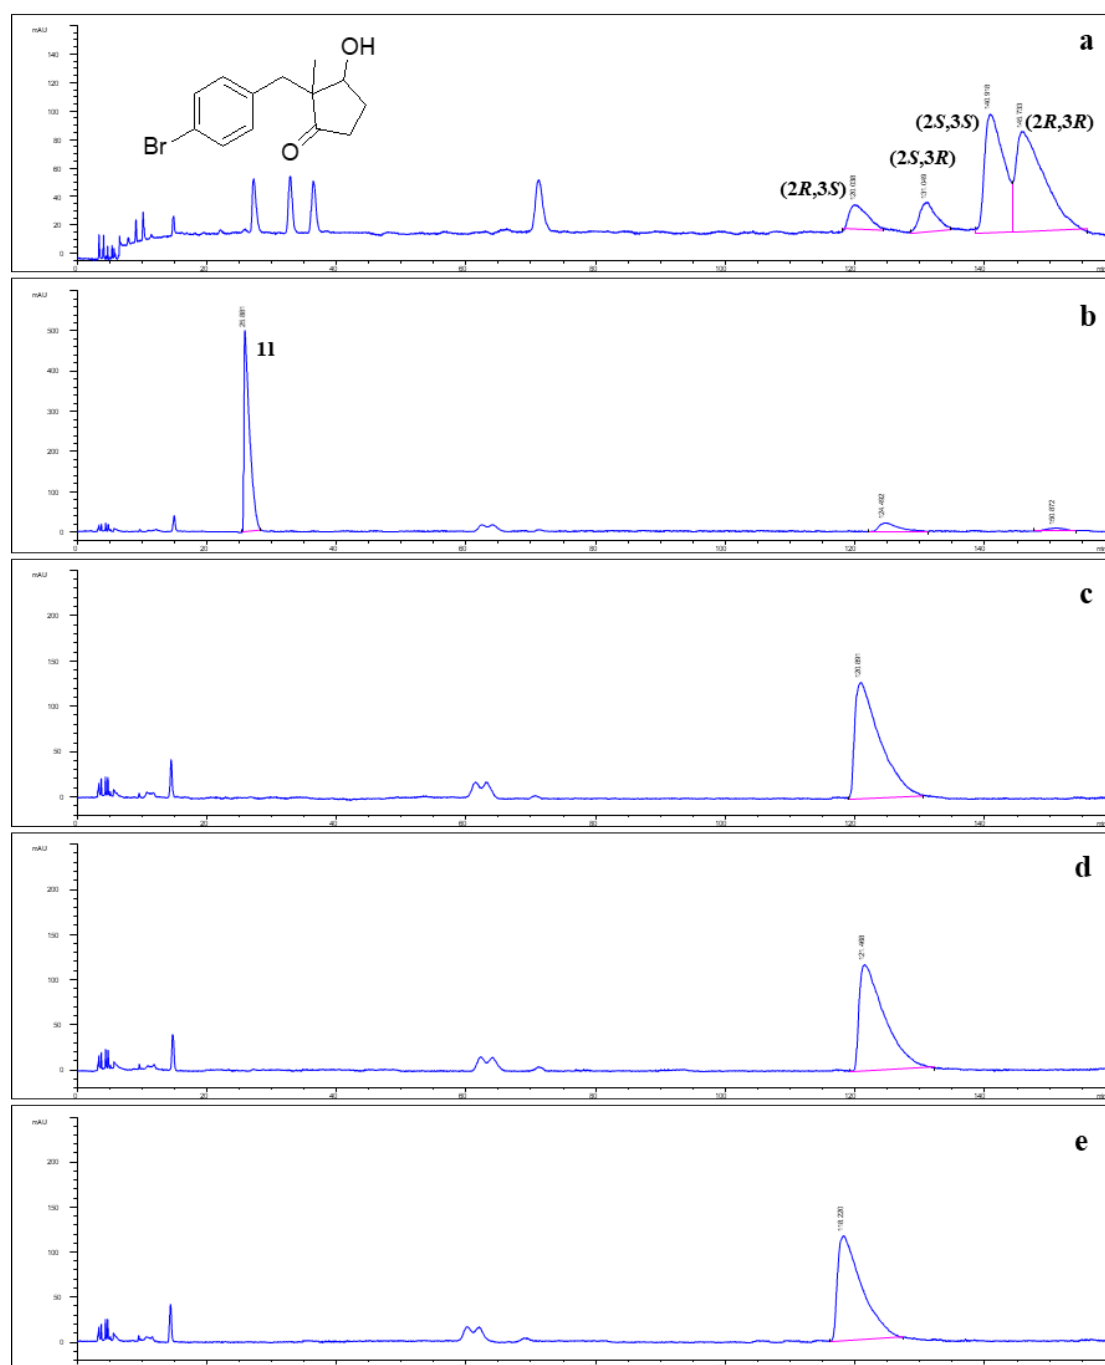

**Figure S17** HPLC traces for a) the NaBH<sub>4</sub>-reduction products of **11** (racemic diastereomers) b) the WT enzyme reduction; c) the Tb1 enzyme reduction; d) the Tb2 enzyme reduction; e) the Tb3 enzyme reduction.

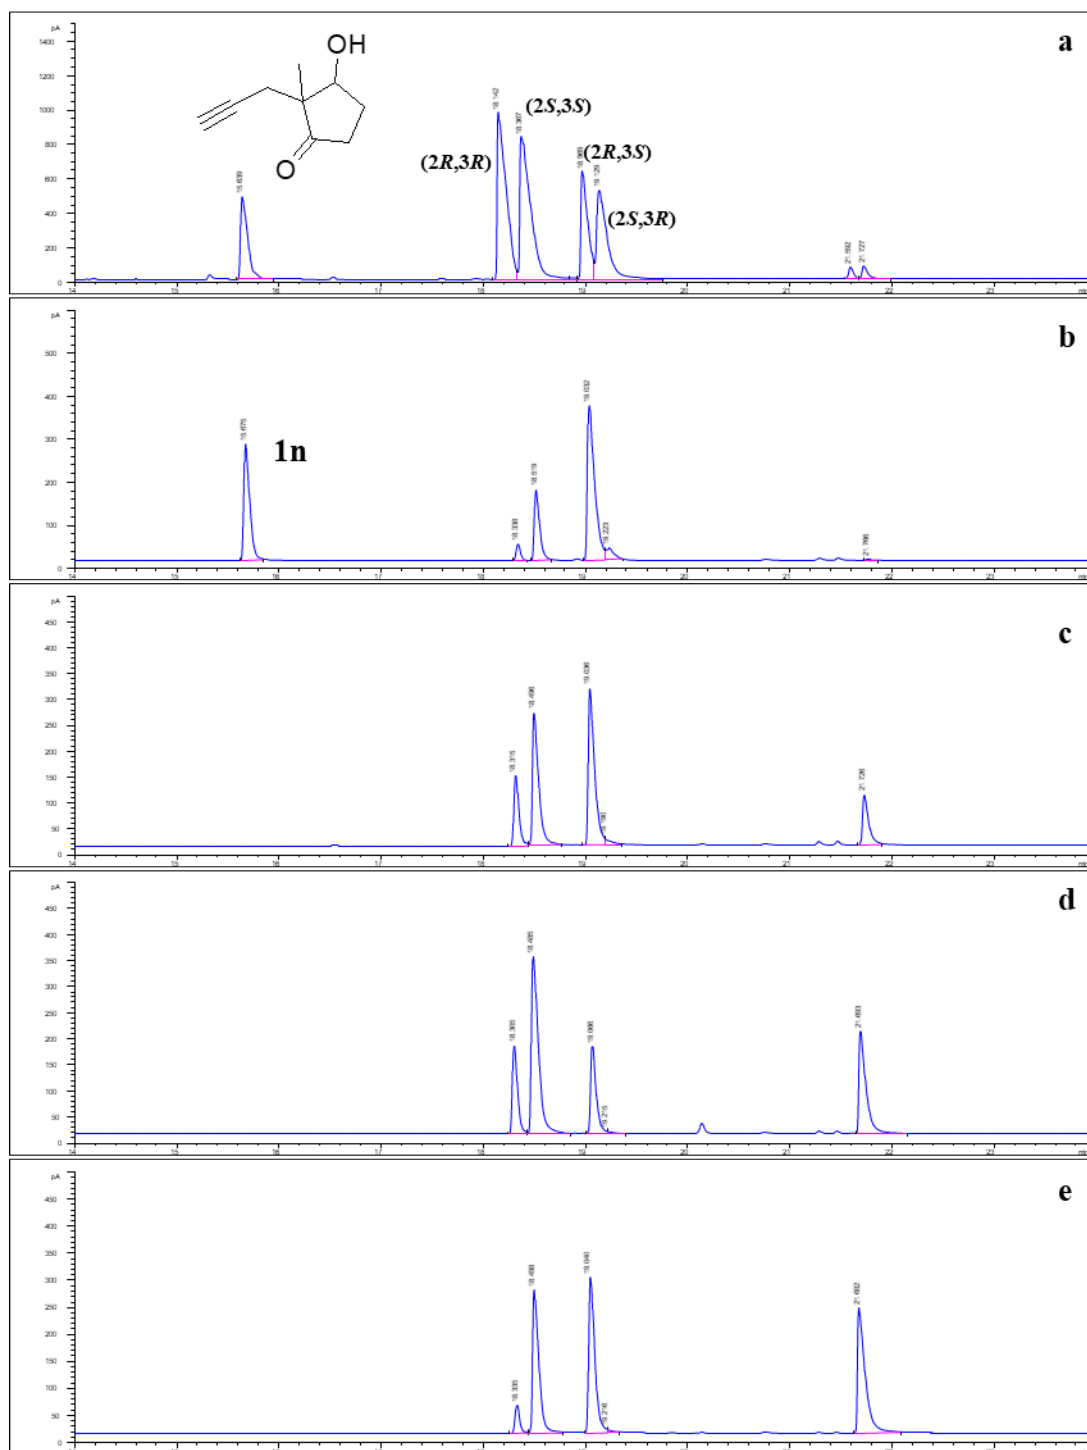

**Figure S18** HPLC traces for a) the NaBH<sub>4</sub>-reduction products of **1n** (racemic diastereomers) b) the WT enzyme reduction; c) the Tb1 enzyme reduction; d) the Tb2 enzyme reduction; e) the Tb3 enzyme reduction.

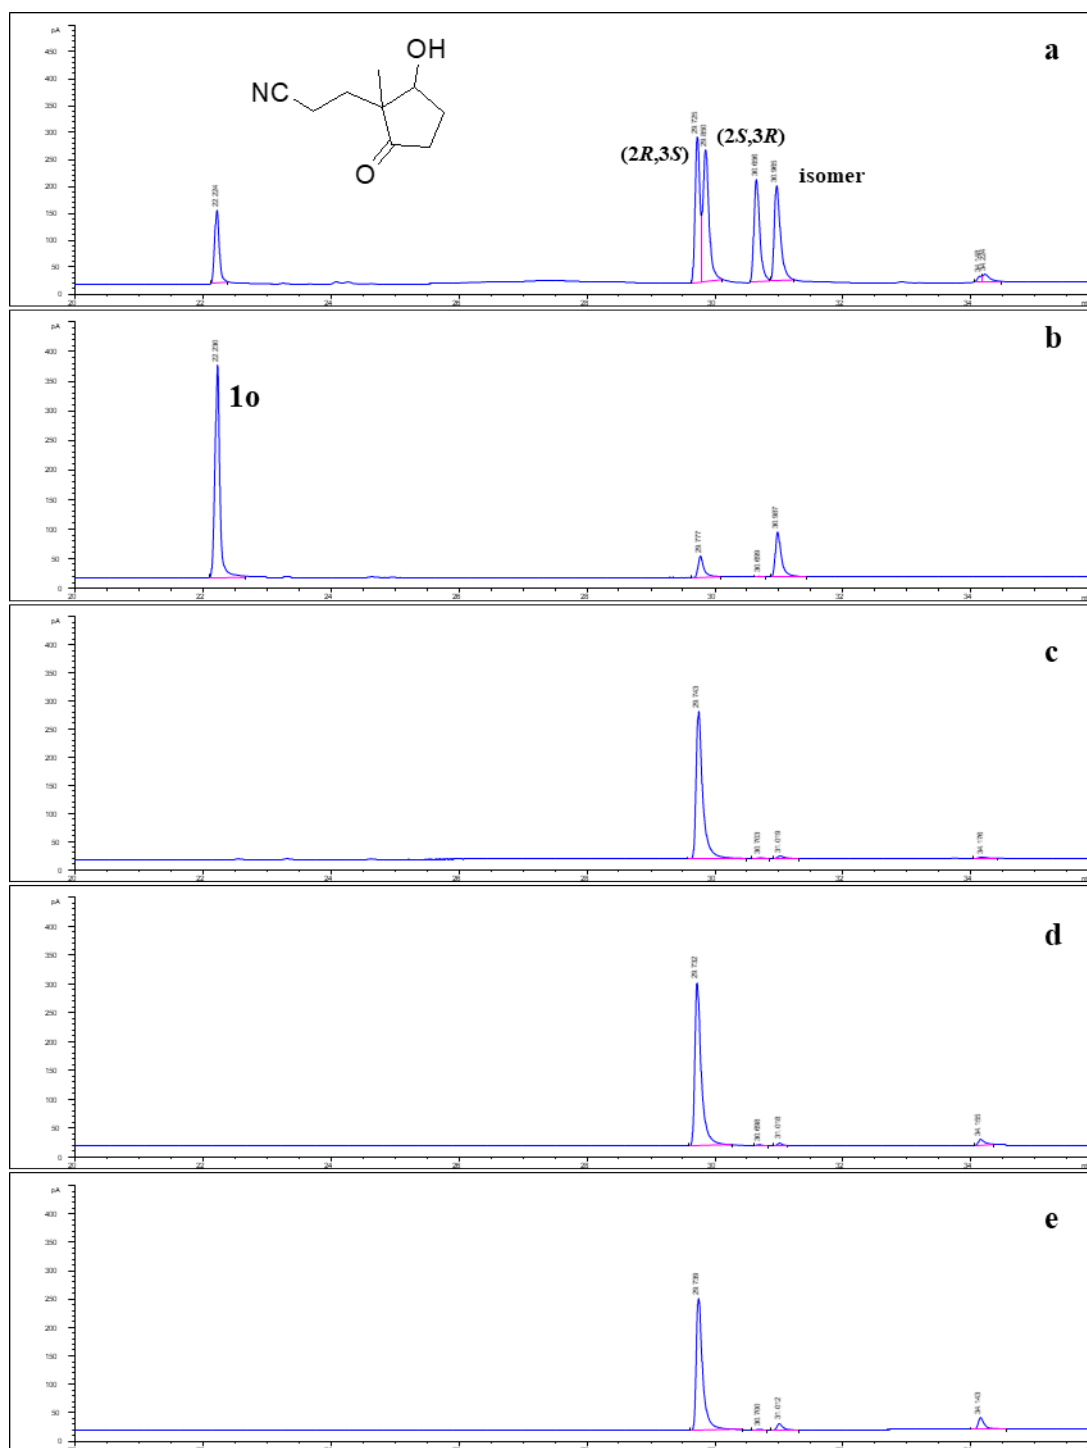

**Figure S19** HPLC traces for a) the  $\text{NaBH}_4$ -reduction products of **10** (racemic diastereomers) b) the WT enzyme reduction; c) the Tb1 enzyme reduction; d) the Tb2 enzyme reduction; e) the Tb3 enzyme reduction.

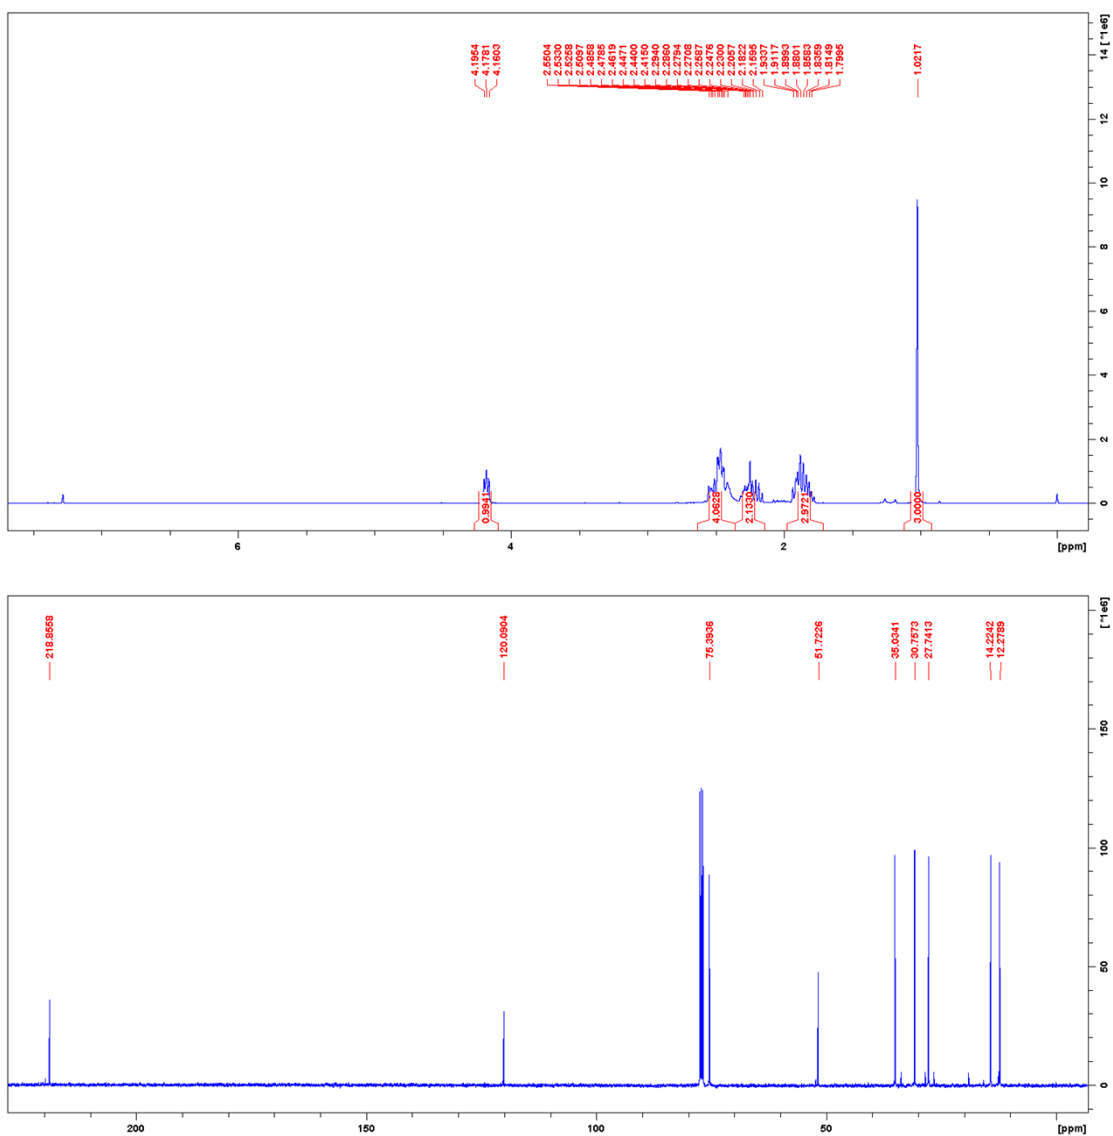

Figure S20 <sup>1</sup>H and <sup>13</sup>C NMR spectra of (2R,3S)-2o.

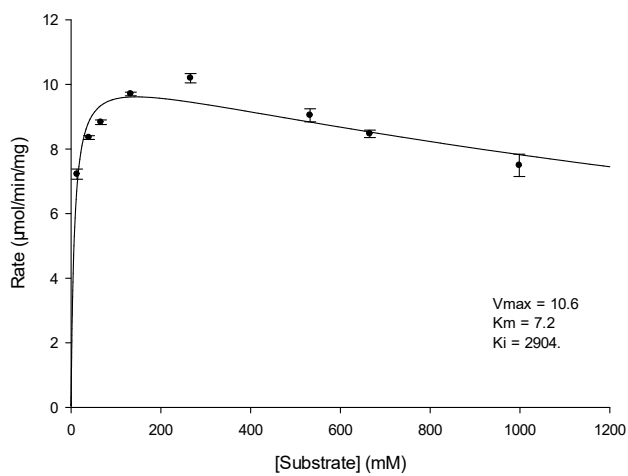

Figure S21 Michaelis-Menten equation curves of TbADH toward isopropanol.

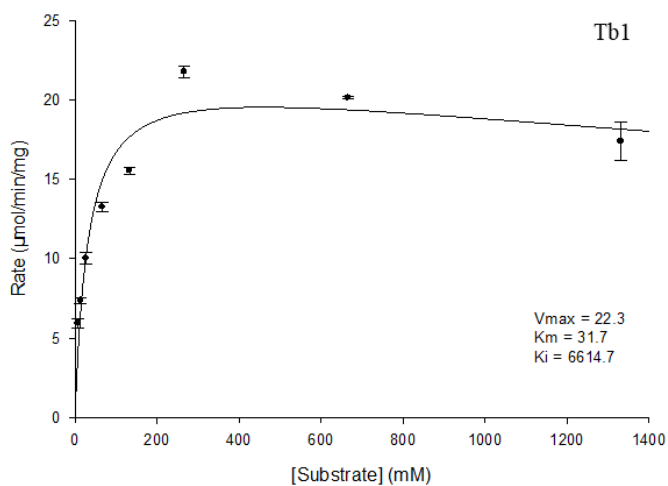

**Figure S22** Michaelis-Menten equation curves of Tb1 toward isopropanol.

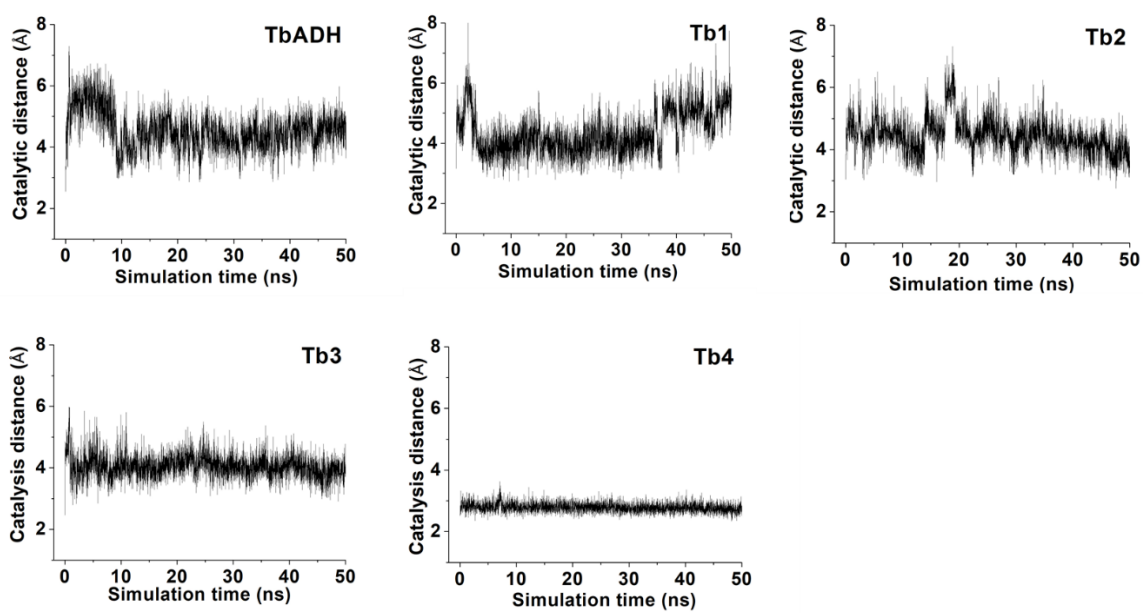

**Figure S23** Catalytic distance of hydride transfer (NADPH-1a).
